# Supplementary material for: Development of a polyvinyl alcohol/sodium alginate hydrogel-based scaffold incorporating bFGF-encapsulated microspheres for accelerated wound healing
Source: PubMed Central journal article supplement (PMC7193649; doi:10.1038/s41598-020-64480-9), 2020-04-30
Supplement: 41598_2020_64480_MOESM1_ESM.pdf [file 41598_2020_64480_MOESM1_ESM.pdf]

# Development of a polyvinyl alcohol/sodium alginate hydrogel-based scaffold incorporating bFGF-encapsulated microspheres for accelerated wound healing

Maedeh Bahadoran<sup>a</sup>, Amir Shamloo<sup>a</sup>, Yeganeh Dorri Nokooriani<sup>a</sup>

<sup>a</sup> Department of Mechanical Engineering, Sharif University of Technology, Tehran, Iran

## Appendix

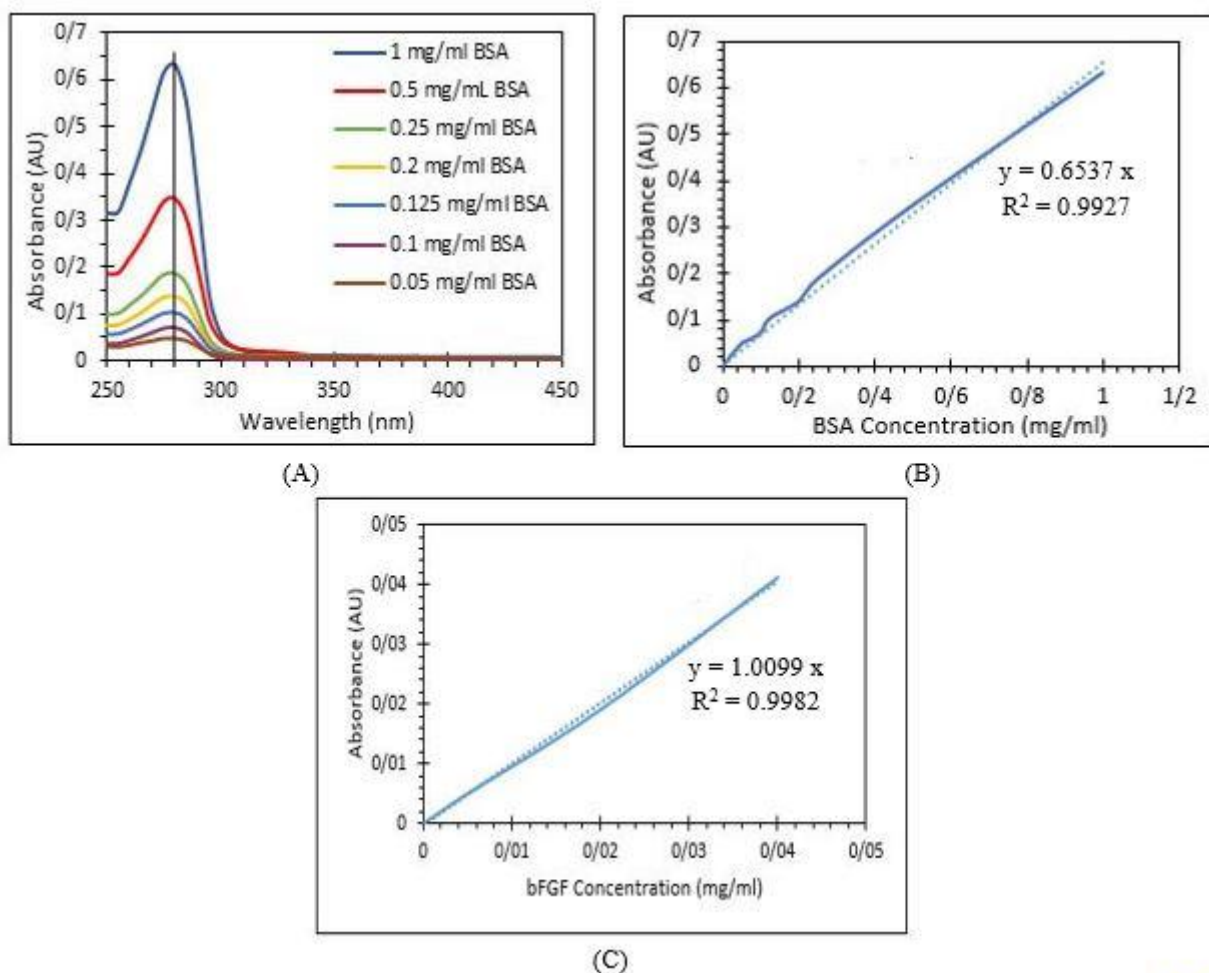

Fig.S1. (A) Absorption spectra of BSA at different concentrations; (B) Calibration curve for BSA at 280 nm; (c) Calibration curve for bFGF at 280 nm.

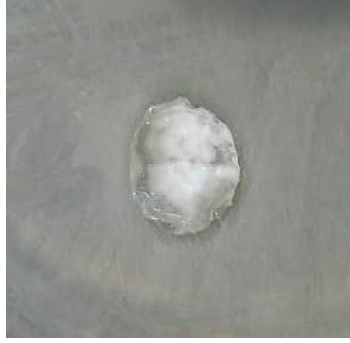

Fig.S2. The antibacterial activity of pure PVA sample against *S. aureus*. The experiment shows no antibacterial activity for this specimen against the mentioned bacteria.
